# Supplementary material for: Evaluation of the Clinical Effectiveness of the Salmeterol/Fluticasone Fixed-Dose Combination Delivered via the Elpenhaler® Device in Greek Patients with Chronic Obstructive Pulmonary Disease and Comorbidities: The AEOLOS Study
Source: MDPI journal article supplement (doi:10.3390/jpm11111159), 2021-11-08
Supplement: s1 [file s1]

Evaluation of the clinical effectiveness of the salmeterol/fluticasone fixed dose combination delivered via the Elpenhaler® device in Greek patients with Chronic Obstructive Pulmonary Disease and comorbidities: the AEOLOS study

Supplementary appendix

**Table S1:** Smoking status at baseline and during the study

| <b>Smoking status</b>                                                                          | <b>(N, %)</b> |
|------------------------------------------------------------------------------------------------|---------------|
| <b>Smoking status– no. (%)</b>                                                                 | <b>N=1016</b> |
| Non-smoker                                                                                     | 68 (6.7)      |
| Ex smoker                                                                                      | 536 (52.8)    |
| Time from discontinuation – years                                                              |               |
| Mean ± SD                                                                                      | 10.4±8.4      |
| Pack-years                                                                                     |               |
| Mean ± SD                                                                                      | 59.3±29.0     |
| Current smoker                                                                                 | 412 (40.5)    |
| Years of smoking ( <i>Mean ± SD</i> )                                                          | 44.7±11.4     |
| Pack-years                                                                                     |               |
| Mean ± SD                                                                                      | 60.4±28.4     |
| <i>No. (%) of patients who discontinued smoking up to 6 months after study initiation</i>      | 111 (10.9)    |
| <i>No. (%) of patients who discontinued smoking between 6-12 months after study initiation</i> | 66 (6.5)      |

**Table S2:** Vaccination during the study

| <b>Vaccination</b>                                       | <b>(N, %)</b> |
|----------------------------------------------------------|---------------|
| <b>No. (%) of patients with at least one vaccination</b> | 688 (67.7)    |
| Influenza                                                | 632 (62.2)    |
| Pneumococcus                                             | 530 (52.2)    |
| Both                                                     | 482 (47.4)    |
| Other                                                    | 6 (0.9)       |

\*% of the total number of study patients, N=1016

**Table S3: COPD treatment during the study**

| <b>COPD treatment</b>                                                    | <b>(N, %)</b> |
|--------------------------------------------------------------------------|---------------|
| <b>No. (%) of patients receiving SFC Elpenhaler® at study initiation</b> | 1016          |
| <b>Monotherapy with SFC Elpenhaler® at baseline – no. (%)</b>            | 421 (41.4)    |
| <b>Combination therapy with SFC Elpenhaler® at baseline* – no. (%)</b>   | 595 (58.6)    |
| ICS+LABA+LAMA                                                            | 486 (47.8)    |
| ICS+LABA+Romilufast                                                      | 14 (1.4)      |
| ICS+LABA+LAMA+Romilufast                                                 | 27 (2.7)      |
| ICS+LABA+LAMA+Theophylline                                               | 45 (4.5)      |
| ICS+LABA+SABA                                                            | 9 (0.9)       |
| ICS+LABA+LAMA+SABA                                                       | 9 (0.9)       |
| Other                                                                    | 5 (0.5)       |
| <b>Change in COPD treatment at 6 months* – no. (%)</b>                   | 26 (2.6)      |
| Addition of LAMA                                                         | 14 (1.4)      |
| Addition of LABA+LAMA                                                    | 4 (0.4)       |
| Addition of ICS                                                          | 2 (0.2)       |
| Addition of Romilufast                                                   | 2 (0.2)       |
| Addition of SABA                                                         | 1 (0.1)       |
| LAMA discontinuation, monotherapy with SFC Elpenhaler®                   | 2 (0.2)       |
| LAMA replaced                                                            | 1 (0.1)       |
| <b>Change in COPD treatment at 12 months* – no. (%)</b>                  | 7 (0.7)       |
| Addition of LABA+LAMA                                                    | 2 (0.2)       |
| Addition of Roflumilast                                                  | 1 (0.1)       |
| Addition of ICS                                                          | 1 (0.1)       |
| LAMA discontinuation, monotherapy with SFC Elpenhaler®                   | 1 (0.1)       |
| Addition of SABA+SAMA                                                    | 1 (0.1)       |
| Holistic diet                                                            | 1 (0.1)       |

\*% of the total number of study patients, N=1016

**Table S4:** Spirometry results at 0, 6 and 12 months and change from baseline and 6 months for the patients without any comorbidities

| Spirometry                                                                                  | Patients without comorbidities (N=238) |                                |                                 |
|---------------------------------------------------------------------------------------------|----------------------------------------|--------------------------------|---------------------------------|
|                                                                                             | Baseline<br>(Day 0)<br>N=238           | Visit 1<br>(6 months)<br>N=158 | Visit 2<br>(12 months)<br>N=158 |
| FEV <sub>1</sub> predicted Lit. –<br>Mean ± SD                                              | 1.48 ± 0.40                            | 1.67 ± 0.48                    | 1.76 ± 0.52                     |
| FEV <sub>1</sub> % predicted – %<br>Mean ± SD                                               | 49.90 ± 8.23                           | 55.95 ± 10.96                  | 59.16 ± 11.84                   |
| <b>Change of FEV<sub>1</sub> (L) from<br/>baseline (Mean ± SD, p-value)</b>                 | -                                      | 0.19 ± 0.24,<br><0.0001        | 0.28 ± 0.27,<br><0.0001         |
| <b>Change of FEV<sub>1</sub> (L) between 6<br/>and 12 months* (Mean ± SD, p-<br/>value)</b> | -                                      | -                              | 0.08 ± 0.24,<br><0.0001         |
| FVC predicted L-<br>Mean ± SD                                                               | 2.78 ± 0.74                            | 2.88 ± 0.74                    | 2.99 ± 0.76                     |
| FVC % predicted<br>Mean ± SD                                                                | 72.25 ± 13.81                          | 74.51 ± 13.67                  | 77.77 ± 13.26                   |
| <b>Change of FVC (L) from<br/>baseline (Mean ± SD, p-value)</b>                             | -                                      | 0.10 ± 0.37,<br>0.002          | 0.21 ± 0.37,<br><0.0001         |
| <b>Change of FVC (L) between 6<br/>and 12 months* (Mean ± SD, p-<br/>value)</b>             | -                                      | -                              | 0.11 ± 0.31, 0.004              |
| FEV <sub>1</sub> /FVC ratio<br>Mean ± SD                                                    | 0.58 ± 0.08                            | 0.63 ± 0.09                    | 0.62 ± 0.10                     |
| <b>Change of FEV<sub>1</sub>/FVC from<br/>baseline (Mean ± SD, p-value)</b>                 | -                                      | 0.05 ± 0.07, <0.0001           | 0.04 ± 0.07, <0.0001            |
| <b>Change of FEV<sub>1</sub>/FVC between 6<br/>and 12 months* (Mean ± SD, p-<br/>value)</b> | -                                      | -                              | -0.003 ± 0.06, 0.534            |

\*Changes between 6-12 months have been assessed by ANCOVA, using baseline spirometry values as covariates

**Table S5:** Spirometry results at 0, 6 and 12 months and change from baseline and 6 months for the patients with at least one comorbidity

| Spirometry                                                                                  | Patients with at least one comorbidity (N=778) |                                |                                 |
|---------------------------------------------------------------------------------------------|------------------------------------------------|--------------------------------|---------------------------------|
|                                                                                             | Baseline<br>(Day 0)<br>N=778                   | Visit 1<br>(6 months)<br>N=634 | Visit 2<br>(12 months)<br>N=588 |
| FEV <sub>1</sub> predicted L –<br>Mean ± SD                                                 | 1.31 ± 0.35                                    | 1.46 ± 0.39                    | 1.51 ± 0.41                     |
| FEV <sub>1</sub> % predicted – %<br>Mean ± SD                                               | 48.10 ± 8.69                                   | 53.70 ± 10.79                  | 55.75 ± 11.73                   |
| <b>Change of FEV<sub>1</sub> (L) from<br/>baseline (Mean ± SD, p-value)</b>                 | -                                              | 0.15 ± 0.21, <0.0001           | 0.20 ± 0.24,<br><0.0001         |
| <b>Change of FEV<sub>1</sub> (L) between 6<br/>and 12 months* (Mean ± SD, p-<br/>value)</b> | -                                              | -                              | 0.05 ± 0.18,<br><0.0001         |
| FVC predicted L-<br>Mean ± SD                                                               | 2.39 ± 0.69                                    | 2.50 ± 0.69                    | 2.59 ± 0.73                     |
| FVC % predicted<br>Mean ± SD                                                                | 67.21 ± 14.39                                  | 70.55 ± 14.08                  | 73.10 ± 15.82                   |
| <b>Change of FVC (L) from<br/>baseline (Mean ± SD, p-value)</b>                             | -                                              | 0.11 ± 0.34, <0.0001           | 0.20 ± 0.42,<br><0.0001         |
| <b>Change of FVC (L) between 6<br/>and 12 months* (Mean ± SD, p-<br/>value)</b>             | -                                              | -                              | 0.09 ± 0.40,<br><0.0001         |
| FEV <sub>1</sub> /FVC ratio<br>Mean ± SD                                                    | 0.58 ± 0.08                                    | 0.61 ± 0.10                    | 0.62 ± 0.12                     |
| <b>Change of FEV<sub>1</sub>/FVC from<br/>baseline (Mean ± SD, p-value)</b>                 | -                                              | 0.036 ± 0.08, <0.0001          | 0.041 ± 0.10,<br><0.0001        |
| <b>Change of FEV<sub>1</sub>/FVC between 6<br/>and 12 months* (Mean ± SD, p-<br/>value)</b> | -                                              | -                              | 0.002 ± 0.09,<br>0.555          |

\*Changes between 6-12 months have been assessed by ANCOVA, using baseline spirometry values as covariates

**Table S6:** Spirometry results at 0, 6 and 12 months and change from baseline and 6 months for the patients with cardiovascular and/or metabolic diseases

| Spirometry                                                                                 | Patients with cardiovascular and/or metabolic diseases N=711 |                                |                                 |
|--------------------------------------------------------------------------------------------|--------------------------------------------------------------|--------------------------------|---------------------------------|
|                                                                                            | Baseline<br>(Day 0)<br>N=714                                 | Visit 1<br>(6 months)<br>N=573 | Visit 2<br>(12 months)<br>N=536 |
| FEV <sub>1</sub> predicted L –<br>Mean ± SD                                                | 1.30 ± 0.34                                                  | 1.44 ± 0.38                    | 1.50 ± 0.40                     |
| FEV <sub>1</sub> % predicted – %<br>Mean ± SD                                              | 47.98 ± 8.76                                                 | 53.61 ± 10.85                  | 55.68 ± 11.65                   |
| <b>Change of FEV<sub>1</sub> (L) from<br/>baseline (Mean ± SD, p-value)</b>                | -                                                            | 0.14 ± 0.21,<br><0.0001        | 0.20 ± 0.24,<br><0.0001         |
| <b>Change of FEV<sub>1</sub> (L) between 6<br/>and 12 months* (Mean ± SD,<br/>p-value)</b> | -                                                            | -                              | 0.06 ± 0.18,<br><0.0001         |
| FVC predicted L-<br>Mean ± SD                                                              | 2.39 ± 0.68                                                  | 2.50 ± 0.67                    | 2.58 ± 0.71                     |
| FVC % predicted<br>Mean ± SD                                                               | 66.97 ± 14.41                                                | 70.59 ± 13.97                  | 73.18 ± 15.84                   |
| <b>Change of FVC (L) from<br/>baseline (Mean ± SD, p-value)</b>                            | -                                                            | 0.11 ± 0.34,<br><0.0001        | 0.20 ± 0.42,<br><0.0001         |
| <b>Change of FVC (L) between 6<br/>and 12 months* (Mean ± SD,<br/>p-value)</b>             | -                                                            | -                              | 0.09 ± 0.41,<br><0.0001         |
| FEV <sub>1</sub> /FVC ratio<br>Mean ± SD                                                   | 0.59 ± 0.08                                                  | 0.61 ± 0.10                    | 0.62 ± 0.12                     |
| <b>Change of FEV<sub>1</sub>/FVC from<br/>baseline (Mean ± SD, p-value)</b>                | -                                                            | 0.035 ± 0.08, <0.0001          | 0.038 ± 0.10, <0.0001           |
| <b>Change of FEV<sub>1</sub>/FVC<br/>between 6 and 12 months*<br/>(Mean ± SD, p-value)</b> | -                                                            | -                              | 0.0007 ± 0.08,<br>0.865         |

\*Changes between 6-12 months have been assessed by ANCOVA, using baseline spirometry values as covariates

**Table S7:** Change of FEV<sub>1</sub> (L) between 0-6, 0-12 and 6-12 months based on GOLD spirometric stages

| <b>Spirometry</b>              | <b><math>\Delta</math> FEV<sub>1</sub> 0-6 months</b> | <b><math>\Delta</math> FEV<sub>1</sub> 0-12 months</b> | <b><math>\Delta</math> FEV<sub>1</sub> 6-12 months</b> |
|--------------------------------|-------------------------------------------------------|--------------------------------------------------------|--------------------------------------------------------|
|                                | (Mean $\pm$ SD)                                       | (Mean $\pm$ SD)                                        | (Mean $\pm$ SD)                                        |
| <b>GOLD spirometric stages</b> |                                                       |                                                        |                                                        |
| (p-value)                      | 0.022                                                 | 0.087                                                  | 0.362                                                  |
| GOLD 1                         | -                                                     | -                                                      | -                                                      |
| GOLD 2                         | 0.14 $\pm$ 0.19                                       | 0.20 $\pm$ 0.24                                        | 0.06 $\pm$ 0.19                                        |
| GOLD 3                         | 0.18 $\pm$ 0.22                                       | 0.23 $\pm$ 0.26                                        | 0.05 $\pm$ 0.19                                        |
| GOLD 4                         | 0.13 $\pm$ 0.22                                       | 0.15 $\pm$ 0.20                                        | 0.02 $\pm$ 0.17                                        |

\*Changes between 0-6, 0-12 and 6-12 months have been assessed byKruskal–Wallis test

**Table S8:** Change of FEV<sub>1</sub> (L) between 0-6, 0-12 and 6-12 months based on mMRCdyspnea scale

| <b>Spirometry</b>         | <b><math>\Delta</math> FEV<sub>1</sub> 0-6 months</b> | <b><math>\Delta</math> FEV<sub>1</sub> 0-12 months</b> | <b><math>\Delta</math> FEV<sub>1</sub> 6-12 months</b> |
|---------------------------|-------------------------------------------------------|--------------------------------------------------------|--------------------------------------------------------|
|                           | (Mean $\pm$ SD)                                       | (Mean $\pm$ SD)                                        | (Mean $\pm$ SD)                                        |
| <b>mMRC dyspnea scale</b> |                                                       |                                                        |                                                        |
| (p-value)                 | 0.200                                                 | 0.083                                                  | 0.060                                                  |
| <b>Stage 0</b>            | 0.08 $\pm$ 0.15                                       | 0.23 $\pm$ 0.37                                        | 0.16 $\pm$ 0.16                                        |
| <b>Stage 1</b>            | 0.17 $\pm$ 0.20                                       | 0.26 $\pm$ 0.25                                        | 0.09 $\pm$ 0.17                                        |
| <b>Stage 2</b>            | 0.17 $\pm$ 0.22                                       | 0.23 $\pm$ 0.26                                        | 0.06 $\pm$ 0.21                                        |
| <b>Stage 3</b>            | 0.14 $\pm$ 0.21                                       | 0.18 $\pm$ 0.24                                        | 0.04 $\pm$ 0.19                                        |
| <b>Stage 4</b>            | 0.14 $\pm$ 0.14                                       | 0.15 $\pm$ 0.17                                        | 0.13 $\pm$ 0.12                                        |

\*Changes between 0-6, 0-12 and 6-12 months have been assessed byKruskal–Wallis test

**Table S9:** mMRC dyspnea scale at 0, 6 and 12 months and difference between study visits for the patients without any comorbidities

| mMRC dyspnea scale                                       | <i>Patients without comorbidities (N=238)</i> |                                            |                                             |
|----------------------------------------------------------|-----------------------------------------------|--------------------------------------------|---------------------------------------------|
|                                                          | <i>Baseline<br/>(Day 0)<br/>N=238, %</i>      | <i>Visit 1<br/>(6 months)<br/>N=235, %</i> | <i>Visit 2<br/>(12 months)<br/>N=231, %</i> |
| Stage 0                                                  | 5 (2.1)                                       | 8 (3.4)                                    | 32 (13.9)                                   |
| Stage 1                                                  | 67 (28.2)                                     | 88 (37.4)                                  | 68 (29.4)                                   |
| Stage 2                                                  | 104 (43.7)                                    | 110 (46.8)                                 | 97 (42)                                     |
| Stage 3                                                  | 60 (25.2)                                     | 28 (11.9)                                  | 30 (13)                                     |
| Stage 4                                                  | 2 (0.8)                                       | 1 (0.4)                                    | 4 (1.7)                                     |
| <b>Difference in mMRC scale between visits*(p-value)</b> | <0.0001                                       |                                            |                                             |

\* Kruskal-Wallis test was used

**Table S10:** mMRC dyspnea scale at 0, 6 and 12 months and difference between study visits for the patients with at least one comorbidity

| mMRC dyspnea scale                                       | <i>Patients with at least one comorbidity (N=778)</i> |                                            |                                             |
|----------------------------------------------------------|-------------------------------------------------------|--------------------------------------------|---------------------------------------------|
|                                                          | <i>Baseline<br/>(Day 0)<br/>N=778, %</i>              | <i>Visit 1<br/>(6 months)<br/>N=757, %</i> | <i>Visit 2<br/>(12 months)<br/>N=735, %</i> |
| Stage 0                                                  | 2 (0.3)                                               | 16 (2.1)                                   | 35 (4.8)                                    |
| Stage 1                                                  | 123 (15.8)                                            | 227 (30)                                   | 231 (31.4)                                  |
| Stage 2                                                  | 353 (45.4)                                            | 356 (47)                                   | 337 (45.9)                                  |
| Stage 3                                                  | 261 (33.5)                                            | 144 (19)                                   | 118 (16.1)                                  |
| Stage 4                                                  | 39 (5)                                                | 14 (1.8)                                   | 14 (1.9)                                    |
| <b>Difference in mMRC scale between visits*(p-value)</b> | <0.0001                                               |                                            |                                             |

\* Kruskal-Wallis test was used

**Table S11:** mMRC dyspnea scale at 0, 6 and 12 months and difference between study visits for the patients with cardiovascular and/or metabolic diseases

| mMRC dyspnea scale                                       | <i>Patients with cardiovascular and/or metabolic diseases (N=711)</i> |                                            |                                             |
|----------------------------------------------------------|-----------------------------------------------------------------------|--------------------------------------------|---------------------------------------------|
|                                                          | <i>Baseline<br/>(Day 0)<br/>N=714, %</i>                              | <i>Visit 1<br/>(6 months)<br/>N=693, %</i> | <i>Visit 2<br/>(12 months)<br/>N=671, %</i> |
| Stage 0                                                  | 2 (0.3)                                                               | 14 (2)                                     | 26 (3.9)                                    |
| Stage 1                                                  | 106 (14.8)                                                            | 203 (29.3)                                 | 212 (31.6)                                  |
| Stage 2                                                  | 322 (45.1)                                                            | 327 (47.2)                                 | 306 (45.6)                                  |
| Stage 3                                                  | 246 (34.5)                                                            | 136 (19.6)                                 | 114 (17)                                    |
| Stage 4                                                  | 38 (5.3)                                                              | 13 (1.9)                                   | 13 (1.9)                                    |
| <b>Difference in mMRC scale between visits*(p-value)</b> | <0.0001                                                               |                                            |                                             |

\* Kruskal-Wallis test was used



**Table S12:** Satisfaction from the device, as assessed by FSI-10 questionnaire at 6 months for the total number of patients

| <b>FSI-10 Questionnaire</b><br>(Mean $\pm$ SD, Median)                                                  | <b>Visit 1</b><br>(6 months)<br>N=993 |
|---------------------------------------------------------------------------------------------------------|---------------------------------------|
| 1. Has it been easy to learn how to use the inhaler?                                                    | 4.23 $\pm$ 0.75, 4.00                 |
| 2. Was it easy to prepare the inhaler for use?                                                          | 4.10 $\pm$ 0.82, 4.00                 |
| 3. Was it easy to use the inhaler?                                                                      | 4.27 $\pm$ 0.74, 4.00                 |
| 4. Was it easy to keep the inhaler clean and in good working condition?                                 | 4.38 $\pm$ 0.67, 4.00                 |
| 5. Was it easy to continue normal activities with the use of the inhaler?                               | 4.37 $\pm$ 0.69, 4.00                 |
| 6. Did the inhaler fit your lips comfortably?                                                           | 4.46 $\pm$ 0.63, 5.00                 |
| 7. Was using the inhaler easy in terms of size and weight?                                              | 4.21 $\pm$ 0.74, 4.00                 |
| 8. Was it easy to carry the inhaler with you?                                                           | 4.00 $\pm$ 0.91, 4.00                 |
| 9. After you've used the inhaler, do you have the feeling that you used it correctly?                   | 4.43 $\pm$ 0.63, 5.00                 |
| 10. Overall, considering your responses to the previous questions, were you satisfied with the inhaler? | 4.34 $\pm$ 0.62, 4.00                 |
| <b>Total FSI-10 score</b>                                                                               |                                       |
| Mean $\pm$ SD                                                                                           | 42.80 $\pm$ 5.48                      |
| Min, Max                                                                                                | 13.00, 50.00                          |

FSI: Feeling of Satisfaction with the Inhaler

**Table S13:** Summary characteristics of the recorded Adverse Events

| <b>Adverse Events</b>                                      | <b>(N, %)</b> |
|------------------------------------------------------------|---------------|
| <b>No. (%) of patients studied</b>                         | 1016          |
| No. (%) of patients with at least one AE                   | 12 (1.2)      |
| No. (%) of patients with at least one SAE                  | 11 (1.1)      |
| No. (%) of patients with at least one treatment-related AE | 1 (0.1)       |
| <b>AE related to study drug – no. (%)</b>                  | <b>N=12</b>   |
| Yes                                                        | 1 (8.3)       |
| No                                                         | 11 (91.7)     |
| <b>Serious AE – no. (%)</b>                                | <b>N=12</b>   |
| Yes                                                        | 11 (91.7)     |
| No                                                         | 1 (8.3)       |
| <b>Seriousness criteria – no. (%)</b>                      | <b>N=11</b>   |
| Fatal                                                      | 10 (90.9)     |
| Required hospitalization                                   | 1 (9.1)       |

AE: adverse event; SAE: severe adverse event

**Table S14:** List of Adverse Events (serious and non-serious), by SOC and PT

| System Organ Class (SOC)                             | Preferred Term (PT)                | Total no. of AEs<br>N=1016 (% <sup>†</sup> ) |
|------------------------------------------------------|------------------------------------|----------------------------------------------|
| Cardiac disorders                                    | Cardiac arrest                     | 1 (0.1)                                      |
|                                                      | Cardiac failure                    | 1 (0.1)                                      |
| General disorders and administration site conditions | Death                              | 6 (0.6)                                      |
| Infections                                           | Oropharyngeal gonococcal infection | 1 (0.1)                                      |
|                                                      | Pneumonia*                         | 1 (0.1)                                      |
| Respiratory, thoracic and mediastinal disorders      | Hypercapnia*                       | 1 (0.1)                                      |
|                                                      | Pickwickian syndrome*              | 1 (0.1)                                      |
| Surgical and medical procedures                      | Inguinal hernia repair             | 1 (0.1)                                      |
|                                                      | Thoracic operation                 | 1 (0.1)                                      |

\* One patient had 3 events: Pneumonia, hypercapnia, and pickwickian syndrome; <sup>†</sup>% of the total number of study patients
